# Supplementary material for: A high-performance histidine-functionalized MWCNT-GONR/Co–Ni LDH flower cluster structural composite via a microwave synthesis for supercapacitors
Source: Royal Society of Chemistry journal article supplement (doi:10.1039/d0dt00438c), 2020-01-01
Supplement: d0dt00438c1.pdf [file d0dt00438c1.pdf]

**High-performance histidine-functionalized MWCNTS-GONRs/Co-Ni LDH  
flower cluster structural composite via microwave synthesis for  
supercapacitor**

Hengrui Qiu, Xuejiao Sun, Shengli An, Dawei Lan, Jinlong Cui, Yongqiang Zhang\*\*, Wenxiu He\*

School of Chemistry and Chemical Engineering, Inner Mongolia University of Science & Technology, Baotou, Inner Mongolia 014010, China

*E-mail:* wenxiu\_he@foxmail.com

*Fax:* +86-0472-5953323

*Tel:* +86-0472-5953323

---

\* Corresponding author at: E-mail address: wenxiu\_he@foxmail.com. Tel: +86-0472-5953323. Fax: +86-0472-5953323.

\*\* Corresponding author at: E-mail address: yongqiang\_zhang1203@foxmail.com. Tel: +86-0472-5951506. Fax: +86-0472-5951506.

The obvious peak at about  $3434\text{ cm}^{-1}$  is attributed to the presence of hydroxyl groups. The bands at  $1720$  and  $1391\text{ cm}^{-1}$  are characteristics of the carboxy groups and O-H deformation vibration [1]. The typical C=C conjugation and C-C band are nearly  $1639$  and  $1080\text{ cm}^{-1}$ , respectively [2]. In addition, the band at  $1550\text{ cm}^{-1}$  can originate from histidine and corresponds to the C-N stretching vibration [3].

The N1s spectrum can be fitted into three peaks at  $398.5$ ,  $400.1$ , and  $401.6\text{ eV}$ , assigned to pyridinic, pyrrolic and graphitic N, respectively. This result demonstrates that the histidine functionalization of MWCNTs-GONRs is successful.

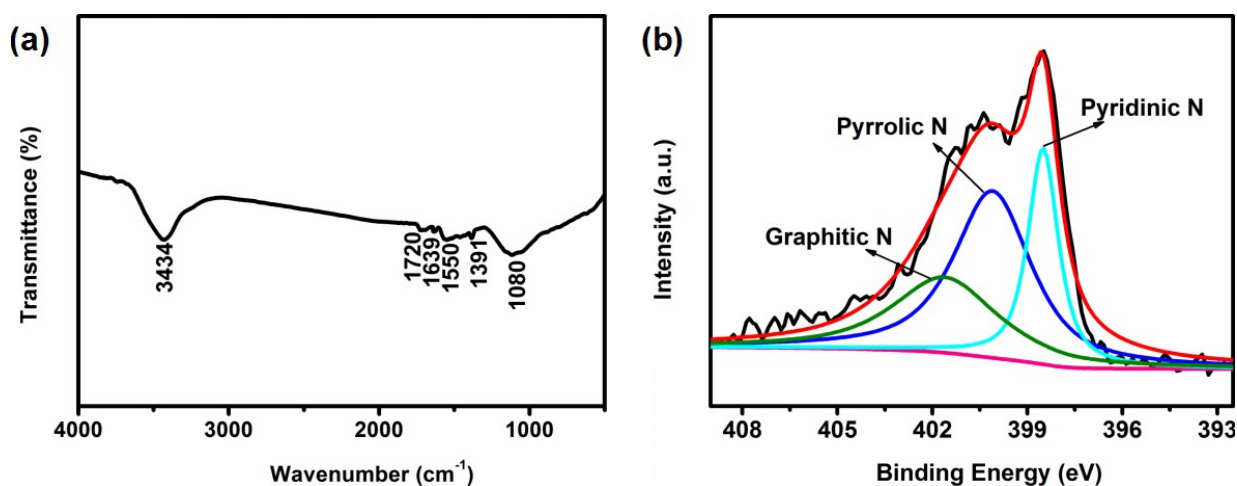

**Fig. S1.** The FT-IR and XPS spectra of His-MW.

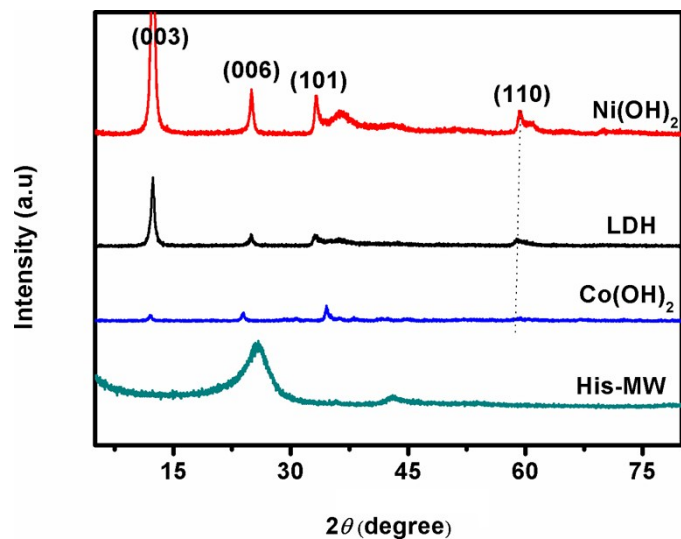

Fig. S2. XRD patterns of other materials.

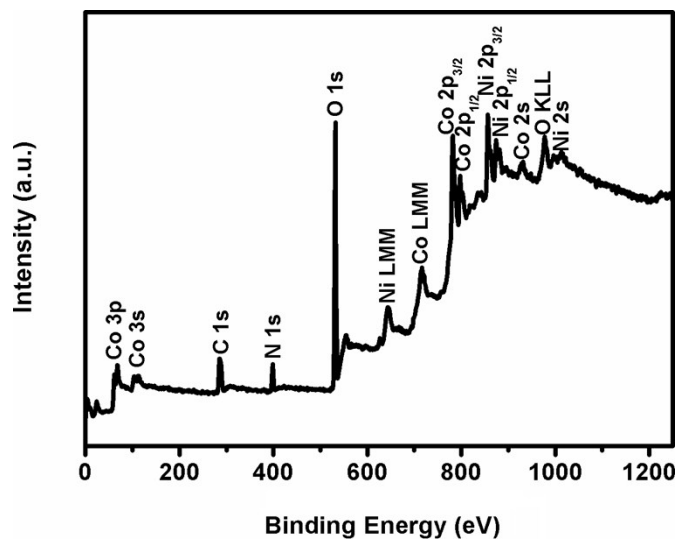

Fig. S3. survey scan of His-MW/LDH.

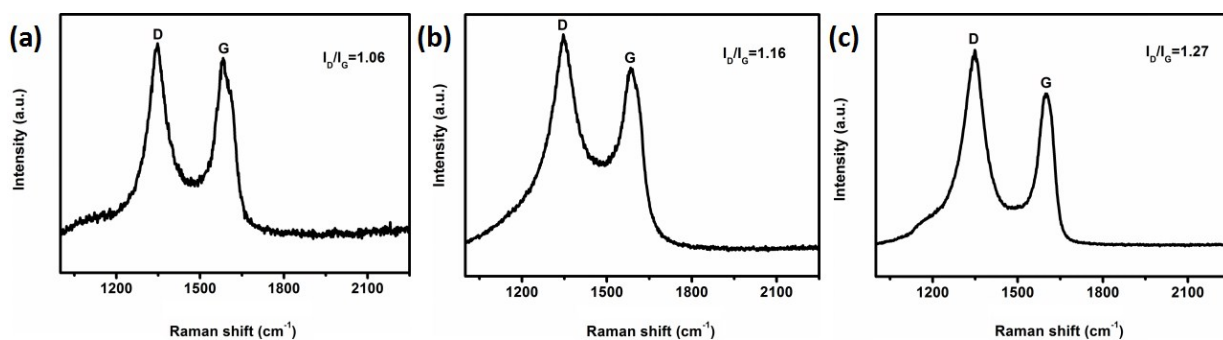

**Fig. S4.** Raman spectra of (a) MWCNTs-GONRs (b) His-MW and (c) His-MW/LDH.

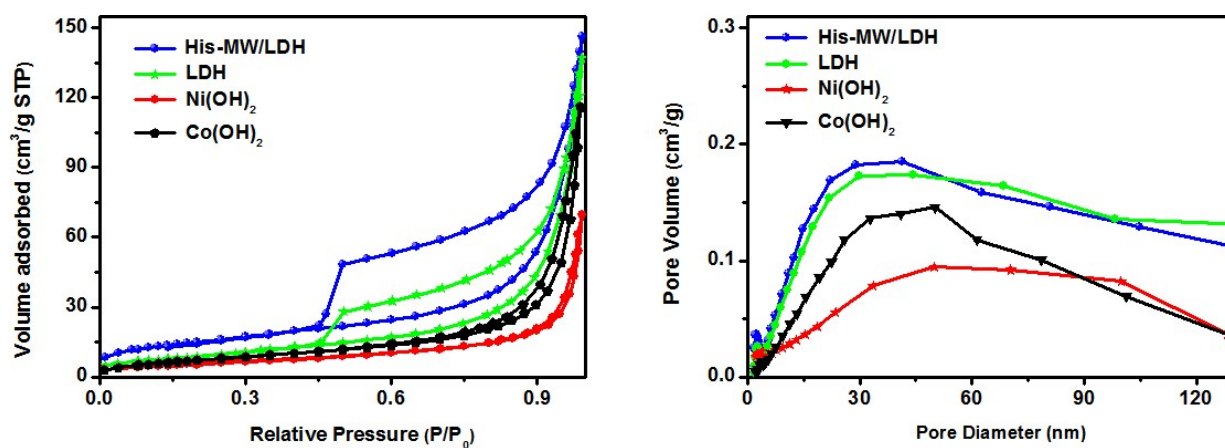

**Fig. S5.** (a) BET and (b) BJH curves of samples.

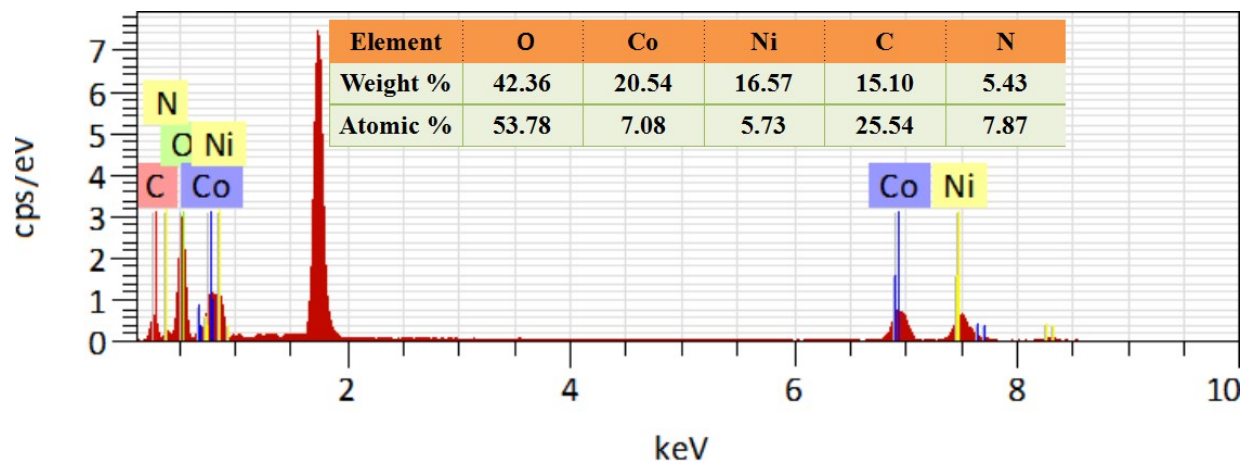

**Fig. S6.** EDS spectrum and element concentration of His-MW/LDH.

The CV curve of nickel foam is close to a straight line, which indicates that it has a small capacitance. And the GCD curve proves the result. The EIS curve indicates its rationality as a collector fluid. Through the analysis of its electrochemical properties, we can come to a conclusion that nickel foam as a substrate will not affect the electrochemical properties of the active material.

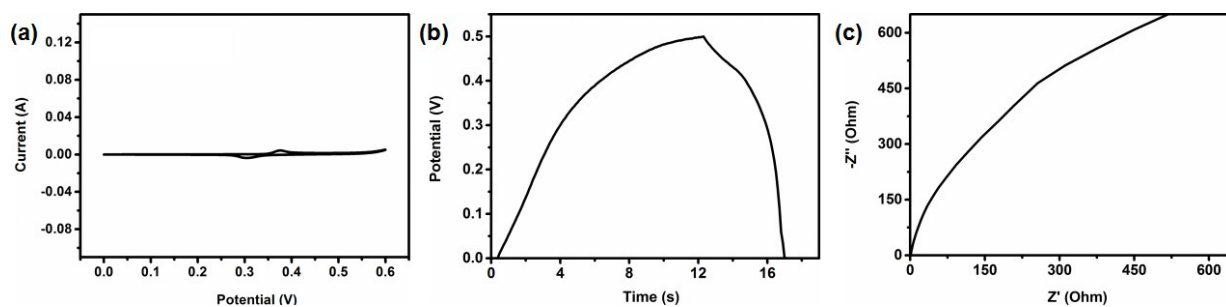

**Fig. S7.** The CV, GCD and EIS curves of Nickel foam.

$$i = av^b \quad (1)$$

$$\log i = b \log v + \log a \quad (2)$$

$$i(V)/v^{1/2} = k_1 v^{1/2} + k_2 \quad (3)$$

where  $i$ ,  $v$ ,  $a$ ,  $b$  indicate the current, scanning rate, and the adjustable parameters, respectively. To obtain the value of  $b$ , the logarithm of both sides of equation (1) is taken, and subsequently linear fitting of  $\log i$  and  $\log v$  is done. Meanwhile, the value of  $b$  also indicates that the electrodes possess battery or pseudo-capacitor properties. The  $V$ ,  $k_1$ ,  $k_2$  present the specified voltage and the adjustable parameters, respectively. In the same way, the value of  $k_1$  can be obtained by linear fitting  $i(V)/v^{1/2}$  and  $v^{1/2}$  in formula (3) under the specified voltage. Finally,  $k_1 v$  is the contribution of pseudocapacitor to the current at each specific voltage.

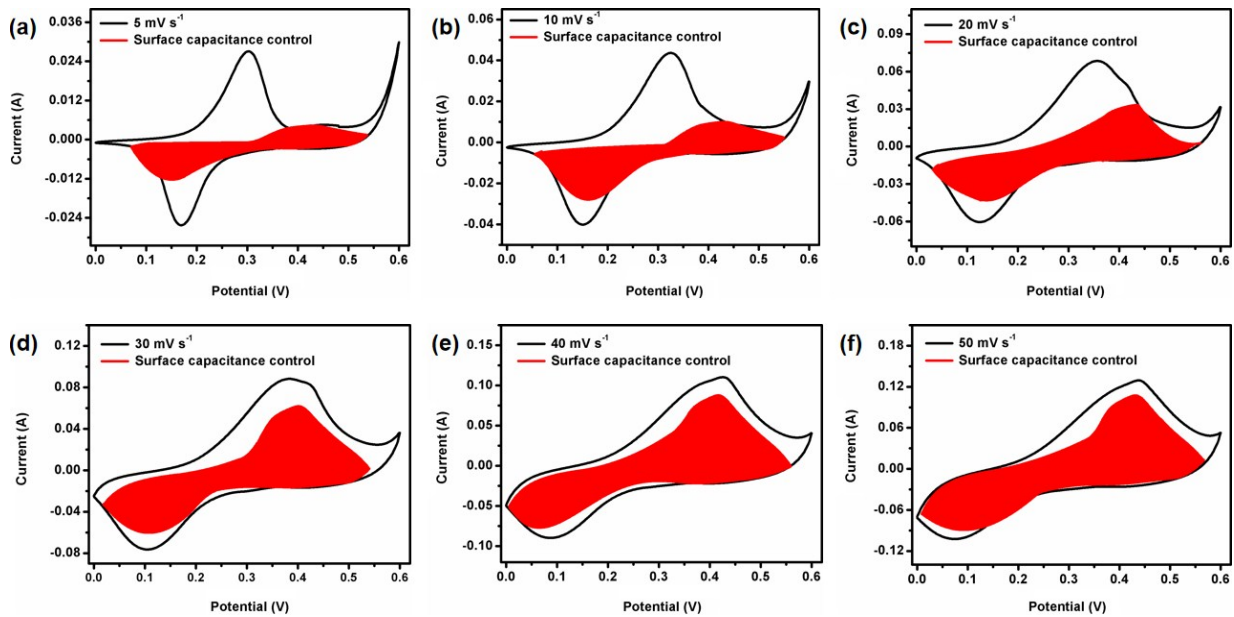

**Fig. S8.** The capacitance contribution to charge storage of His-MW/LDH at different scan rates.

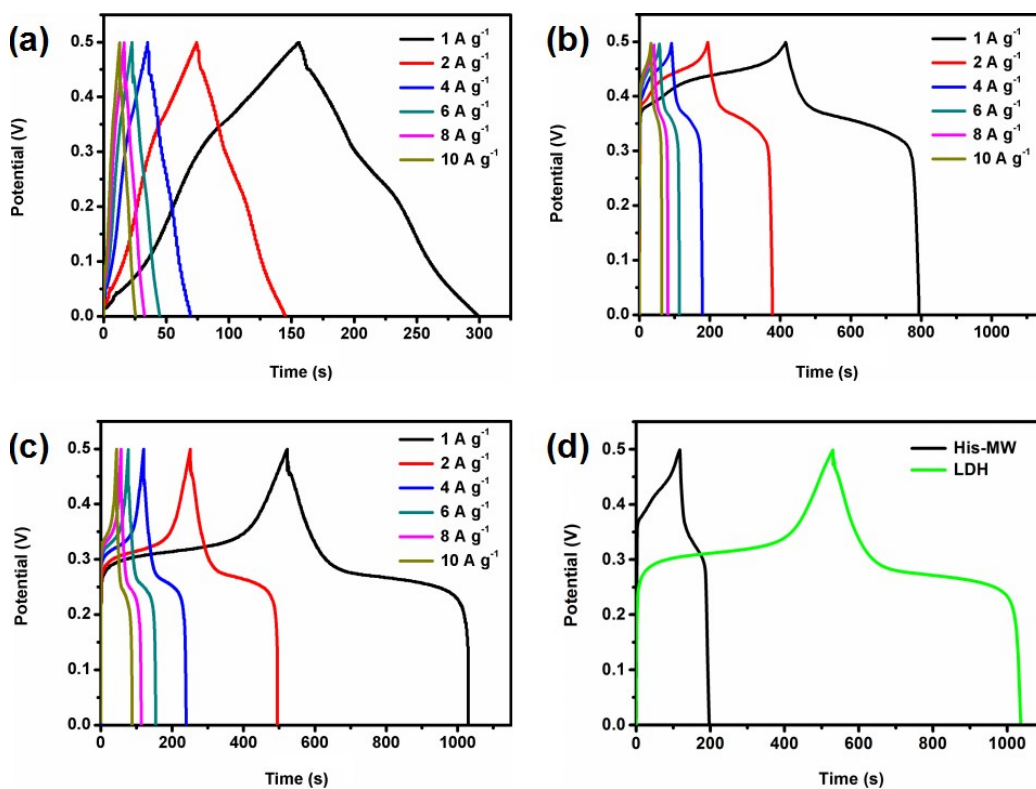

**Fig. S9.** The GCD curves of (a) Co(OH)<sub>2</sub>, (b) Ni(OH)<sub>2</sub>, (c) LDH electrodes at various current densities and (d) His-MW with LDH electrode at 1 A g<sup>-1</sup>.

The curve shape and integral area of MW/LDH are similar to that of His-MW/LDH, indicating that their specific capacitance is also similar. As shown in Fig. S10b, His-MW/LDH and MW/LDH electrode possess 1674 and 1577 F g<sup>-1</sup> at 1 A g<sup>-1</sup>, respectively. The result show that the histidine functionalization of carbon materials plays a positive role in the electrochemical properties of the composites.

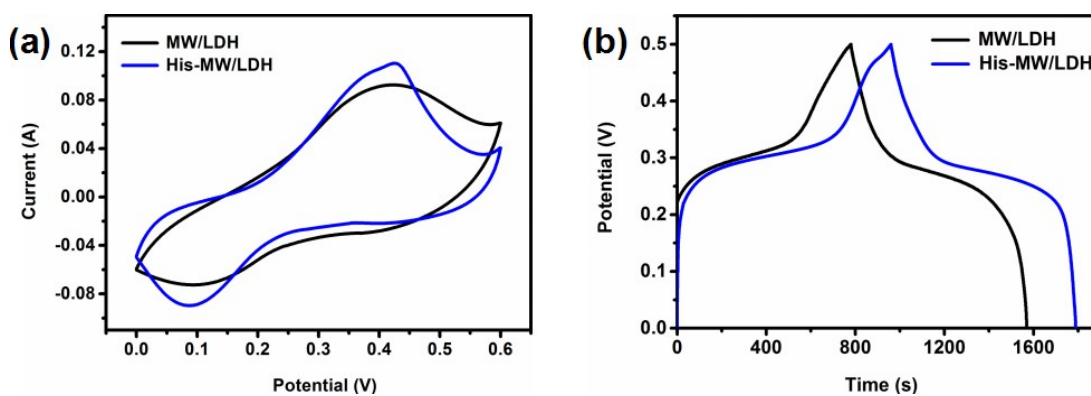

**Fig. S10.** The (a) CV and (b) GCD curves of MW/LDH with His-MW/LDH electrodes.

The  $R_s$  and  $R_{ct}$  of His-MW/LDH, LDH,  $Ni(OH)_2$  and  $Co(OH)_2$  electrodes are 0.28, 0.61, 0.75, 0.40  $\Omega$  and 0.59, 0.93, 0.21, 0.28  $\Omega$ .

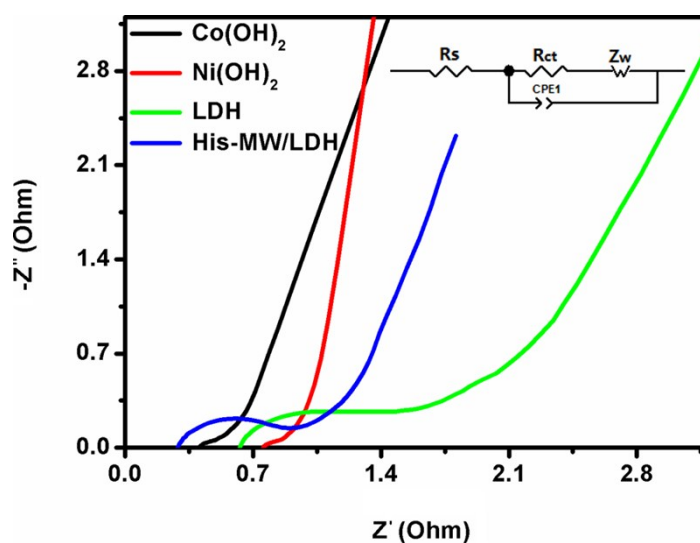

**Fig. S11.** Nyquist plots of electrodes.

The  $R_s$  are 0.36, 0.79, 0.95, and 0.54  $\Omega$  for the His-MW/LDH, LDH,  $Ni(OH)_2$  and  $Co(OH)_2$  electrodes. The  $R_{ct}$  are 0.76, 2.23, 0.51, and 0.41  $\Omega$  for the His-MW/LDH, LDH,  $Ni(OH)_2$  and  $Co(OH)_2$  electrodes.

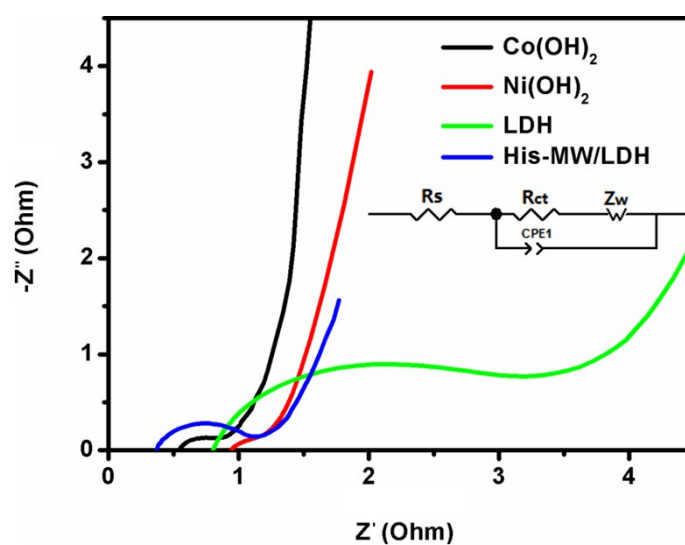

**Fig. S12.** The Nyquist plots of the electrodes after 2000 times cycle.



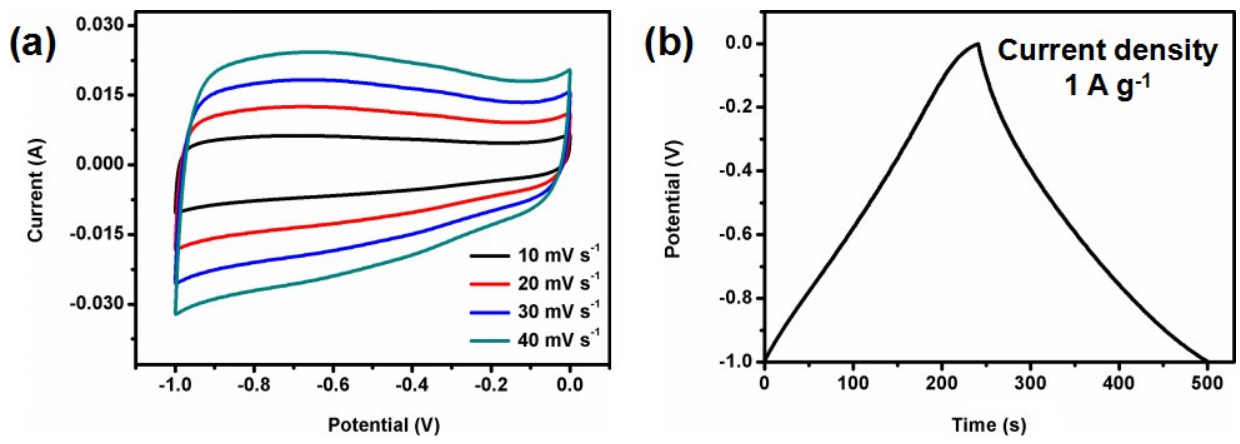

Fig. S13. CV and GCD curves of AC electrode.

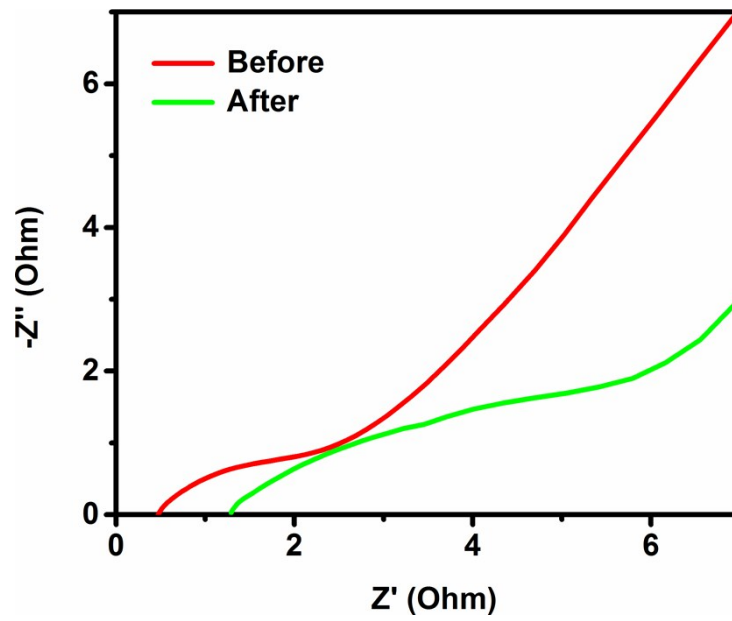

Fig. S14. EIS curves of device

Table S1

| electrode                                                                                    | Electrolyte | Specific capacitance<br>(F g <sup>-1</sup> ) at 1 A g <sup>-1</sup> | Retention (%)<br>cycling Number<br>current density | Refs.     |
|----------------------------------------------------------------------------------------------|-------------|---------------------------------------------------------------------|----------------------------------------------------|-----------|
| KCu <sub>7</sub> S <sub>4</sub> @NiCo-LDH                                                    | 6 M KOH     | 1104.5                                                              | 83.5% after 1000 times at 8 A g <sup>-1</sup>      | [4]       |
| PCF@RGO/Ni Co-LDH                                                                            | 1 M KOH     | 1220.5                                                              | 84.1% after 5000 times at 8 A g <sup>-1</sup>      | [5]       |
| $\alpha$ -Co/Ni(OH) <sub>2</sub> @Co <sub>3</sub> O <sub>4</sub> -70                         | 6 M KOH     | 1000                                                                | 72.34% after 8000 times at 2 A g <sup>-1</sup>     | [6]       |
| Co(CO <sub>3</sub> ) <sub>0.5</sub> (OH)/Ni <sub>2</sub> (CO <sub>3</sub> )(OH) <sub>2</sub> | 6 M KOH     | 987                                                                 | 82.9% after 2000 times at 10 A g <sup>-1</sup>     | [7]       |
| MnO <sub>2-2</sub> /NiCo-LDH/CC                                                              | 1 M KOH     | 217                                                                 | 97% after 5000 times at 2 A g <sup>-1</sup>        | [8]       |
| ZnCo-PBA@ $\alpha$ -Co(OH) <sub>2</sub>                                                      | 1 M KOH     | 423.92                                                              | 78.48% after 1000 times at 5 A g <sup>-1</sup>     | [9]       |
| LaCO <sub>3</sub> OH-Ni(OH) <sub>2</sub> @RGO                                                | 1 M KOH     | 572.47                                                              | 80% after 2000 times at 10 A g <sup>-1</sup>       | [10]      |
| His-MW/LDH                                                                                   | 6 M KOH     | 1674                                                                | 83.33% after 2000 times at 10 A g <sup>-1</sup>    | This work |

Table S2

| Supercapacitors                                                                                   | Electrolyte                 | Potential window (V) | Specific capacitance ( $F g^{-1}$ ) at 1 $A g^{-1}$ | Maximum energy density ( $Wh kg^{-1}$ ) | Power density ( $kW kg^{-1}$ ) | Retention (%) cycling Number current density | Refs.     |
|---------------------------------------------------------------------------------------------------|-----------------------------|----------------------|-----------------------------------------------------|-----------------------------------------|--------------------------------|----------------------------------------------|-----------|
| RGO@NiMn-LDH@NF//AC                                                                               | 6 M KOH                     | 1.4                  | 84                                                  | 22.5                                    | 0.7                            | 91% after 1000 times at 1 $A g^{-1}$         | [11]      |
| Ni-Co LDH@rGO//rGO                                                                                | poly(vinyl alcohol)/KOH gel | 1.5                  | 112                                                 | 35                                      | 0.750                          | 80.2% after 4000 times at 5 $A g^{-1}$       | [12]      |
| $\alpha$ -Co/Ni(OH) <sub>2</sub> @Co <sub>3</sub> O <sub>4</sub> -70//AC                          | 6 M KOH                     | 1.6                  | 61.33                                               | 23.88                                   | 0.075                          | 63% after 10000 times at 1 $A g^{-1}$        | [6]       |
| Co(CO <sub>3</sub> ) <sub>0.5</sub> (OH)/Ni <sub>2</sub> (CO <sub>3</sub> )(OH) <sub>2</sub> //AC | PVA/KOH gel                 | 1.6                  | 110.3                                               | 39.2                                    | 0.8                            | 83.3% after 5000 times at 10 $A g^{-1}$      | [7]       |
| Ni <sub>0.35</sub> Co <sub>0.65</sub> -LDHs//ACDC (activated cotton-derived carbon)               | 2 M KOH                     | 1.6                  | 157.5                                               | 30.63                                   | 4.9                            | 78.62% after 5000 times at 7 $A g^{-1}$      | [13]      |
| Co <sub>3</sub> O <sub>4</sub> @glucose-modified NiMn-LDH//AC                                     | 6 M KOH                     | 1.6                  | 108                                                 | 38.4                                    | 0.8                            | 89.1% after 2000 times at 5 $A g^{-1}$       | [14]      |
| His-MW/LDH//AC                                                                                    | 6 M KOH                     | 1.6                  | 111                                                 | 39.47                                   | 0.8                            | 93.81% after 6000 times at 10 $A g^{-1}$     | This work |

## References

- [1] D.Sajjad, Y.M. Oskoei, M. Fouladgar, J. Exp. Nanosci., 2016, 11, 1384-1401.
- [2] D.B. Shinde, J. Debgupta, A. Kushwaha, M. Aslam, V.K. Pillai, J. Am. Chem. Soc., 2011, 133, 4168-4171.
- [3] S. Sasha, R.D. Piner, S.T. Nguyen, R.S. Ruoff, Carbon, 2006, 44, 3342-3347.
- [4] P. Yang, C. Jing, J.C. Liu, K. Chen, Y.X. Zhang, Crystengcomm, 2020, Doi:10.1039/c9ce01261c.
- [5] J.Q. Qi , Y.W. Chen, Q. Li , Y.W. Sui, Y.Z. He, Q.K. Meng, F.X. Wei , Y.J. Ren, J.L. Liu, J. Power Sources, 2020, 445, 227342.
- [6] Y.X. Bao, Y. Deng, M.Z. Wang, Z.Y. Xiao, M.H. Wang, Y.L. Fu, Z.Y. Guo, Y. Yang, L. Wang, Appl. Surf. Sci., 2020, 504, 144395.
- [7] G.F. Zhang, P. Qin, R. Nasser, S.K. Li, P. Chen, J.M. Song, Chem. Eng. J., 2020, 124029.
- [8] L.L. Liu, L. Fang, F. Wu, J. Hu, S.F. Zhang, H.J. Luo, B.S. Hu, M. Zhou, J. Alloy. Compd., 2020, 153929.
- [9] X.Y. Sun, S.Q. Li, R.M. Liu, X.L. Sun, X.J. Liu, A.R. Li, W. Li, J. Nanopart. Res., 2020, 22, 37.
- [10] T. Lv, Z.N. Xu, W. Hong, G.F. Li, Y.W. Li, L.S. Jia, Chem. Eng. J., 2020, 382, 123021.
- [11] L. Sun, Y.X. Zhang, Y. Zhang, H.C. Si, W.P. Qin, Y.H. Zhang, Chem. Commun., 2018, 54, 10172-10175.
- [12] S.K. Kiran, S. Shukla, A. Struck, S. Saxena, ACS Appl. Mater. Inter., 2019, 11, 20232-20240.
- [13] Y.Y. Feng, Y.J. Li, W. Yang, H.B. Huang, J. Nanosci. Nanotechno., 2020, 20, 1260-1268.
- [14] W. Quan, Y.Y. Xu, Y.T. Wang, S.C. Meng, D.L. Jiang, M. Chen, Appl. Surf. Sci., 2019,

488, 639-647.
